# Supplementary material for: The super-healing MRL strain promotes muscle growth in muscular dystrophy through a regenerative extracellular matrix
Source: JCI Insight. 2024 Jan 4;9(3):e173246. doi: 10.1172/jci.insight.173246 (PMC11143963; doi:10.1172/jci.insight.173246)
Supplement: Supplemental data [file jciinsight-9-173246-s063.pdf]

**SUPPLEMENTAL INFORMATION**  
**The super-healing MRL strain promotes muscle growth in muscular dystrophy through a regenerative extracellular matrix**  
**O'BRIEN ET AL**

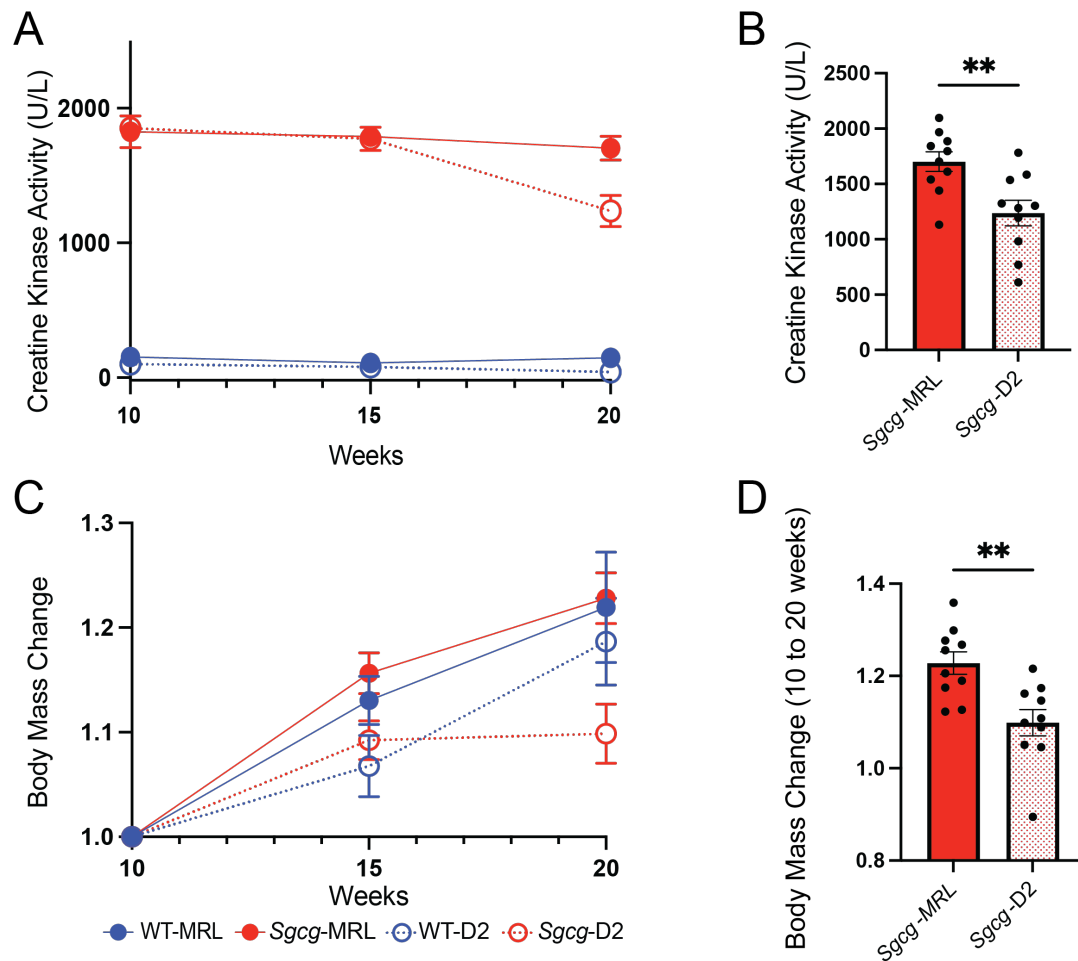

**Supplemental Figure 1.** Body mass and serum were collected and assessed from sex-matched cohorts at 10, 15 and 20 weeks. **(A)** Serum creatine kinase (CK) was monitored. Serum CK was elevated at all timepoints in *Sgcg*-MRL and *Sgcg*-D2 mice compared to their WT counterparts. **(B)** Serum CK in *Sgcg*-D2 mice declined at 20 weeks, paralleling the relative decrease in body mass and muscle mass observed in this cohort. **(C)** Change in body mass relative to the 10-week timepoint was recorded and plotted at 15 and 20-week timepoints. **(D)** The proportional body mass change from 10 to 20 weeks was increased in the MRL background. Graphical quantification of mean  $\pm$  SEM. Student's t-test was used to determine statistical significance. \*\*  $p < 0.01$ .

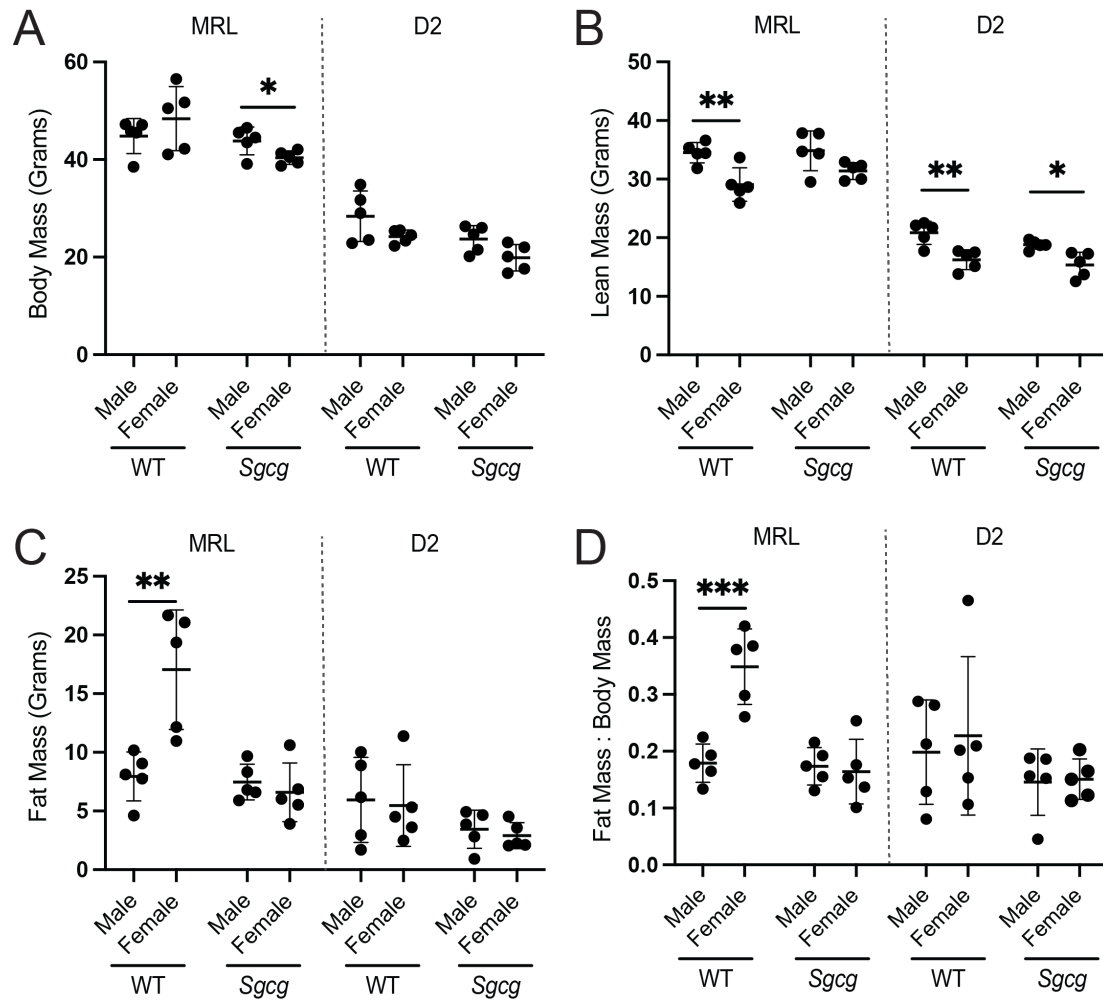

**Supplemental Figure 2. MRL mice were larger than DBA/2J (D2) mice.** Whole body mass and body mass composition analysis is shown from 5 male and 5 female mice at 20 weeks. **(A)** Body mass of the MRL strain was significantly higher than the D2 strain, and female *Sgcg*-MRL were lighter than their *Sgcg*-MRL male mice. **(B)** Lean mass was less in MRL-WT female mice compared to MRL-WT male mice while in *Sgcg*-MRL, male and female lean mass was similar. In the D2 background, females were smaller than males for both WT and *Sgcg* mice. **(C)** Fat mass of the WT-MRL female mice was significantly greater than WT-MRL male mice. **(D)** Fat Mass: Body Mass ratio was significantly greater in the females than the males for WT-MRL mice, and was highly variable for the other comparisons. Graphical quantification of mean  $\pm$  SD. Student's t-test was used to determine statistical significance. \*  $p < 0.05$ , \*\*  $p < 0.01$ , \*\*\*  $p < 0.001$ , \*\*\*\*  $p < 0.0001$ .

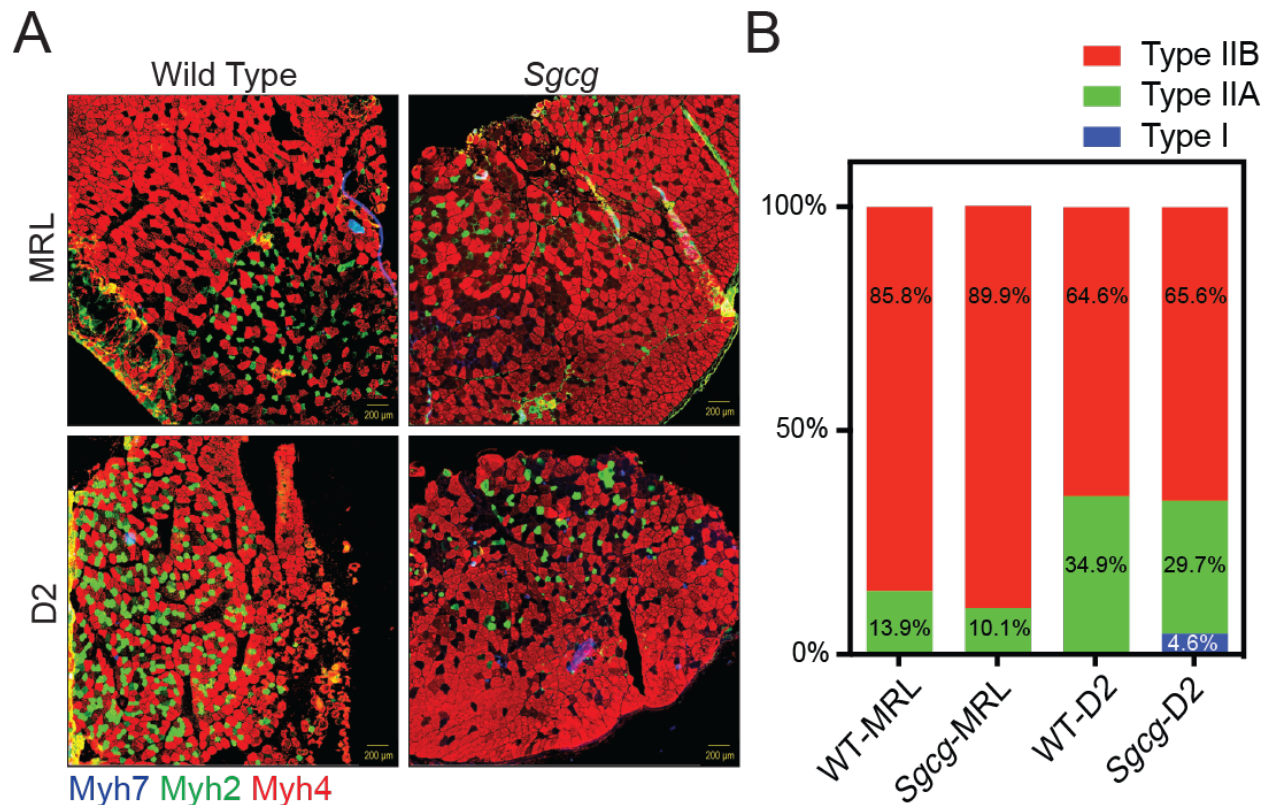

**Supplemental Figure 3. Type I fibers in *Sgcg*-D2 mice were suppressed by the MRL background.** *Tibialis anterior* (TA) muscles were harvested from 3 male mice, cryosectioned, and co-stained with antibodies to Myh7 (type I), Myh2 (type IIA) and Myh4 (type IIB). **(A)** Representative images of muscles showed a higher proportion of Myh4 (type IIB) fibers in the MRL background and a small percentage of Myh7 (type I) fibers in the *Sgcg*-D2 mice. **(B)** Overall, the MRL background had greater Myh4 (type IIB) and less Myh2 (type IIA) compared to the D2 background.

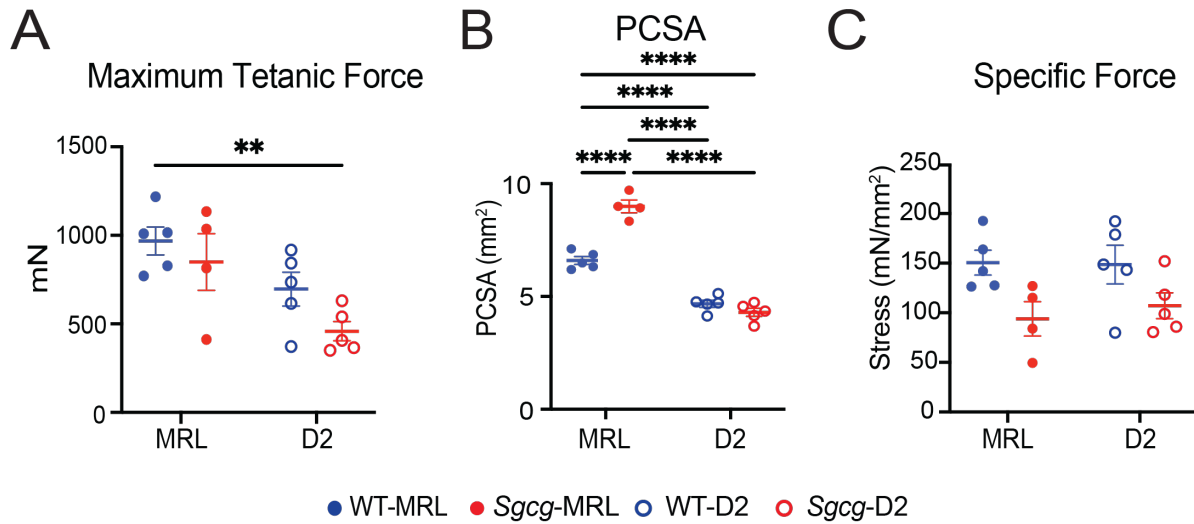

**Supplemental Figure 4. Muscle force measurements demonstrate high variability and no significant differences in force production in *Sgcg* mice from either background strain.**

Muscle force mechanics were conducted on five female mice, 20 weeks of age. **(A)** The maximum tetanic force in the MRL background trended higher than D2 but did not reach significance. **(B)** Physiological Cross-Sectional Area (PCSA) of the MRL background was significantly larger. **(C)** Specific force did not differ by strain or genotype. Graphical quantification of mean  $\pm$  SD. Two-way ANOVA was used to determine statistical significance. \*  $p < 0.05$ , \*\*  $p < 0.01$ , \*\*\*  $p < 0.001$ , \*\*\*\*  $p < 0.0001$ .

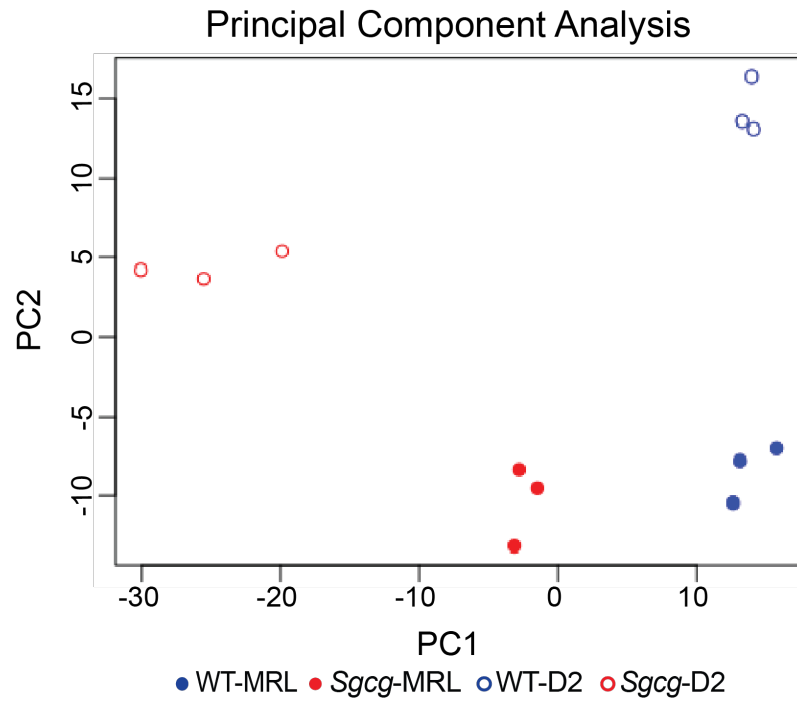

**Supplemental Figure 5.** Principal component analysis (PCA) of RNA sequencing shows distinct clustering of phenotypic cohorts.

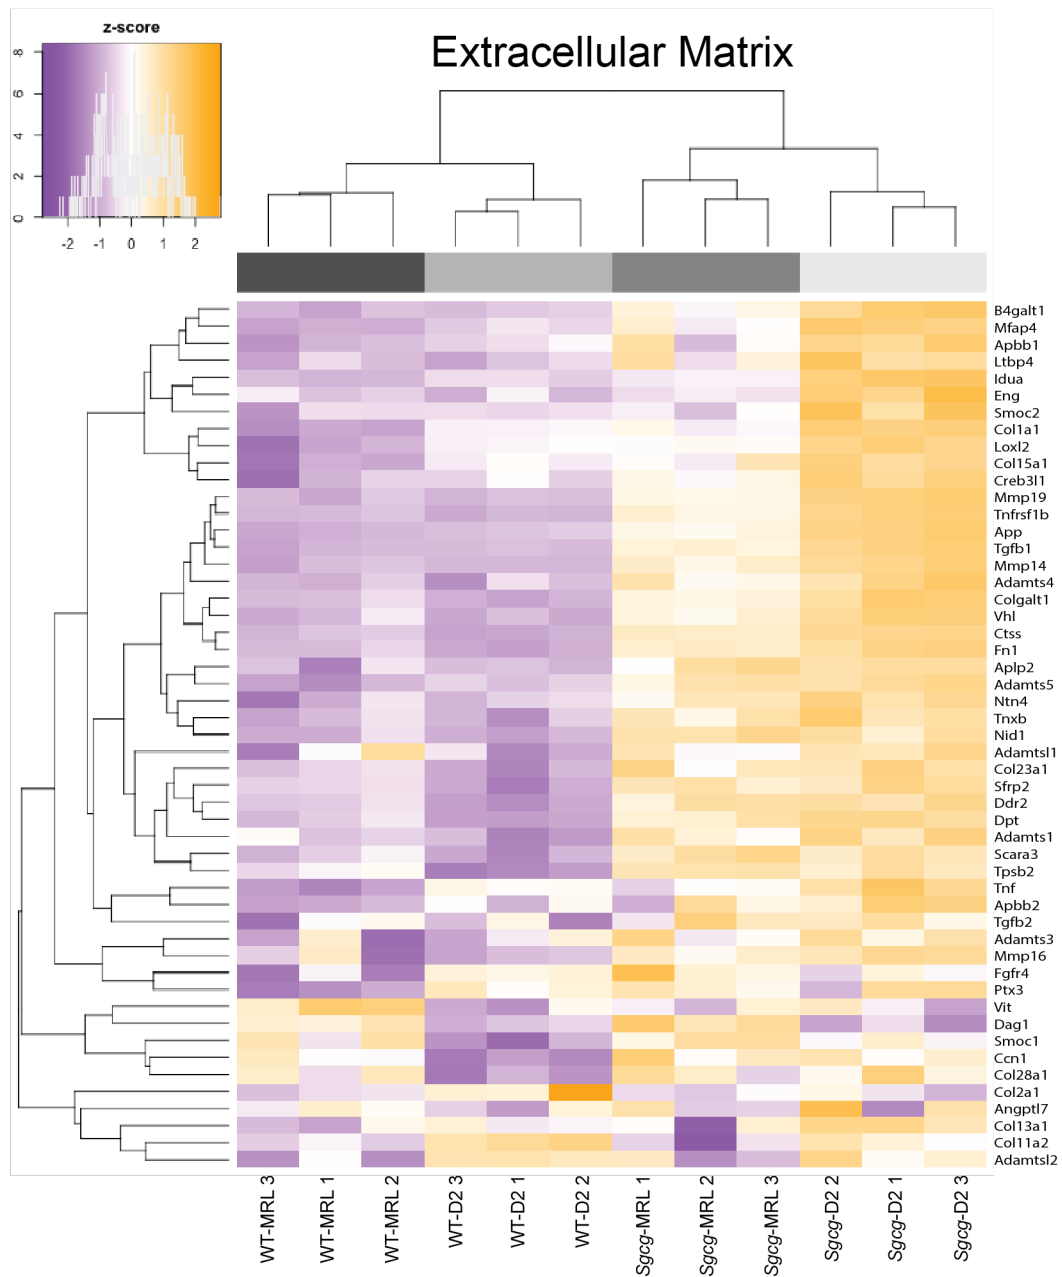

**Supplemental Figure 6.** Clustered heatmap indicates upregulation of ECM genes in the *Sgcg*-D2 muscle.

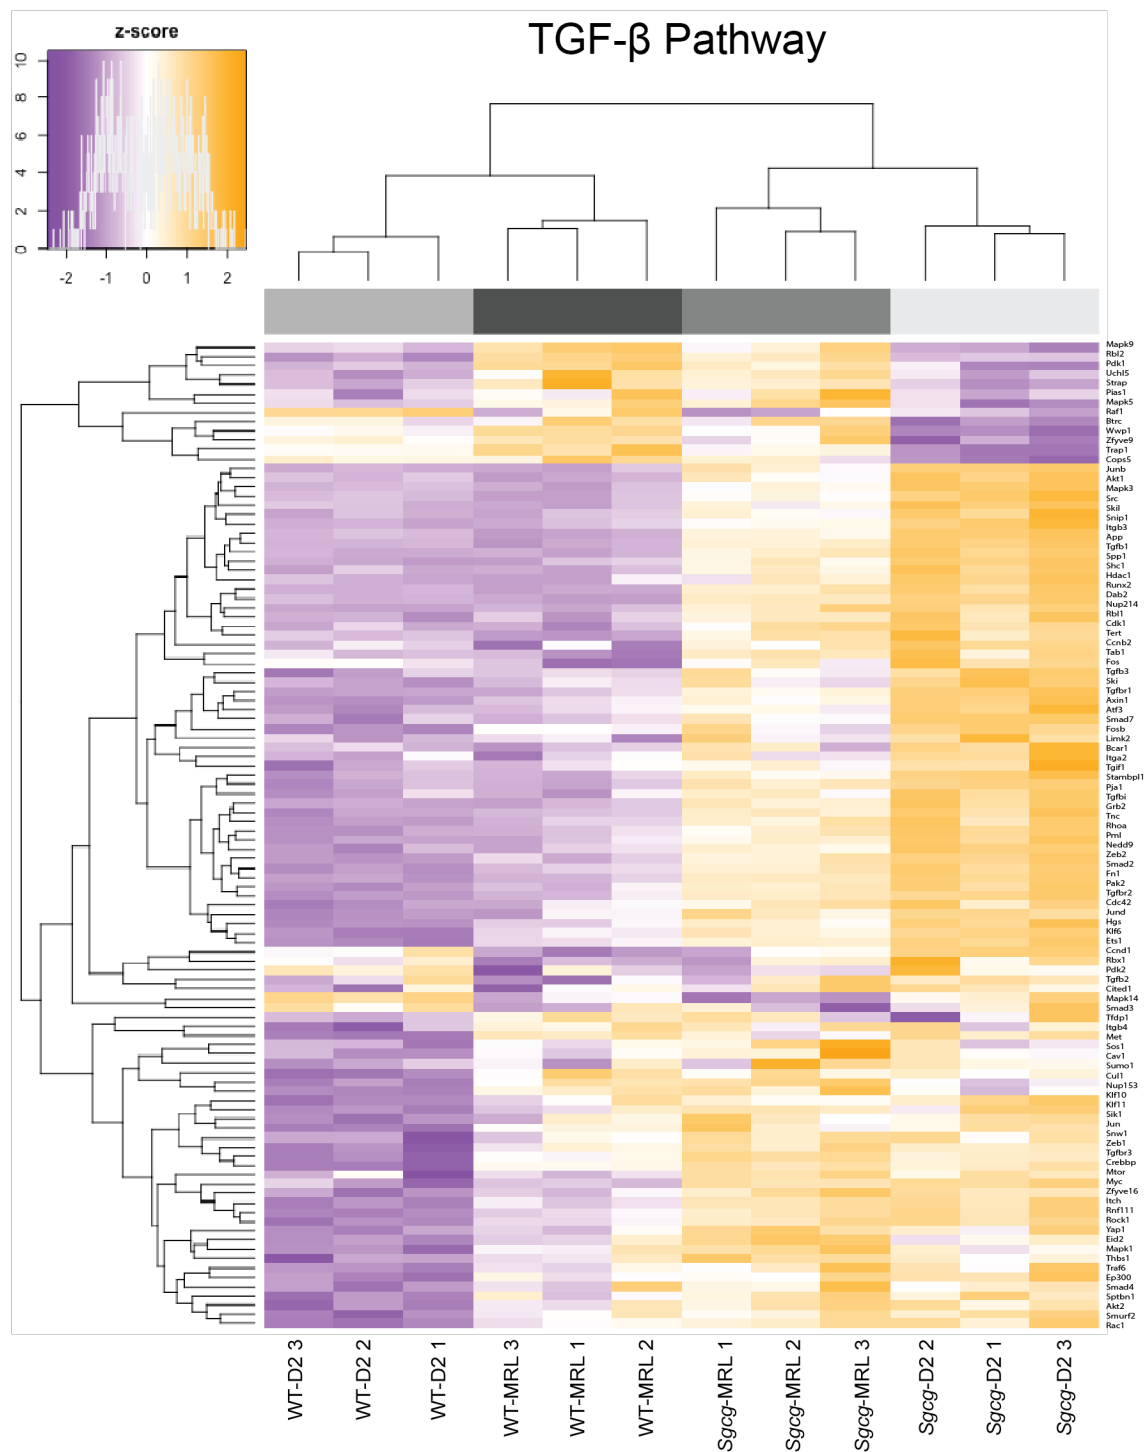

**Supplemental Figure 7.** Clustered heatmap illustrating the differential regulation of TGF- $\beta$  genes in *Sgcg*-MRL compared to *Sgcg*-D2

**A**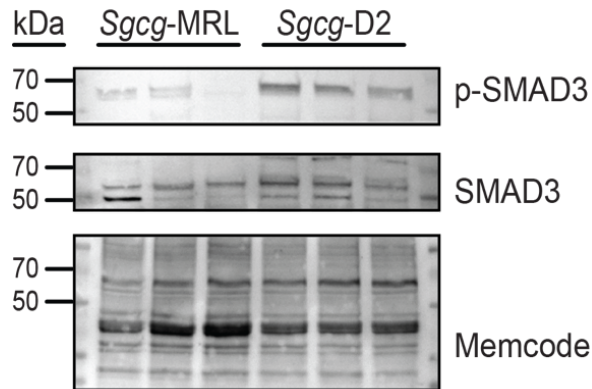**B**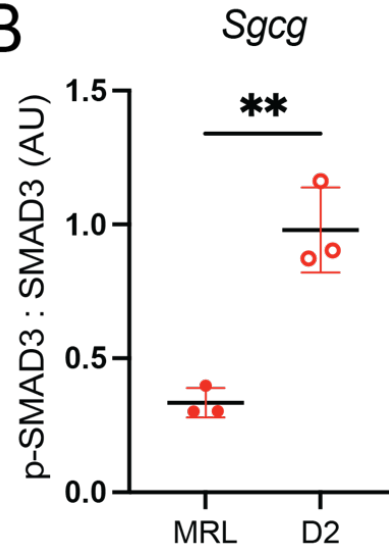

**Supplemental Figure 8. (A)** Immunoblotting of the gastrocnemius/soleus muscles from *Sgcg*-MRL and *Sgcg*-D2 mice showed reduction of phosphorylated SMAD3 (p-SMAD3) relative to total SMAD3 in *Sgcg*-MRL. **(B)** The ratio of p-SMAD3 to total SMAD3 was quantified and indicated TGF- $\beta$  signaling was decreased in the MRL background. Graphical quantification of mean  $\pm$  SD. Student's t-test was used to determine statistical significance. \*\* p<0.01.

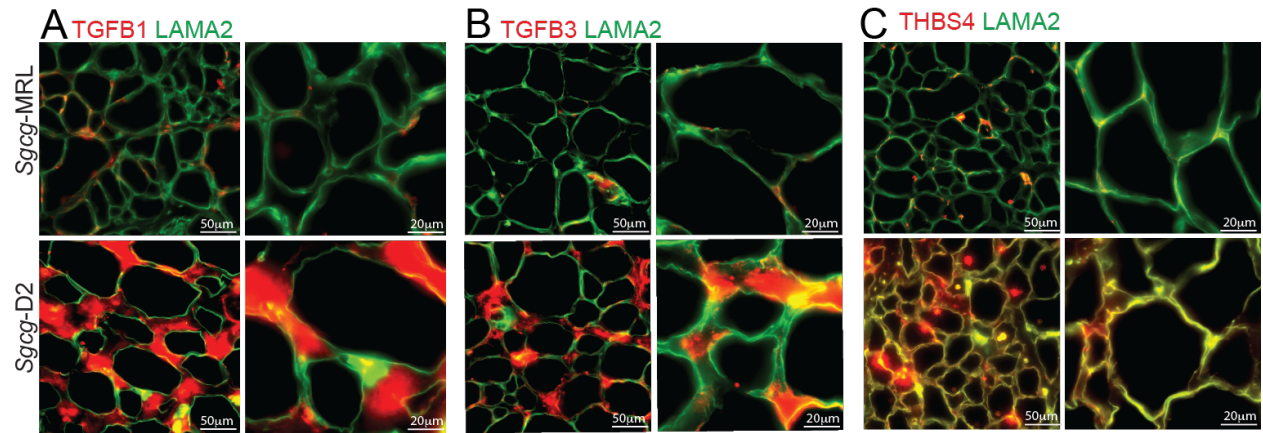

**Supplemental Figure 9.** Decellularized myoscaffolds were generated from *Sgcg*-MRL (top) and *Sgcg*-D2 (bottom) gastrocnemius/soleus (G/S) muscles. **(A)** Representative IFM images of dECM myoscaffolds were co-stained with TGF- $\beta$ 1 (red) and LAMA2 (green) antibodies. TGF- $\beta$ 1 expression was demonstrably reduced in the *Sgcg*-MRL matrix, following the same pattern observed in the quadriceps. **(B)** G/S dECM myoscaffolds were co-stained with TGF- $\beta$ 3 (red) and LAMA2 (green) antibodies and showed reduced TGF- $\beta$ 3 expression in the *Sgcg*-MRL background. **(C)** Immunofluorescent images of thrombospondin-4 (THBS4, red) and LAMA2 (green) show marked reduction of THBS4 in the *Sgcg*-MRL matrix.

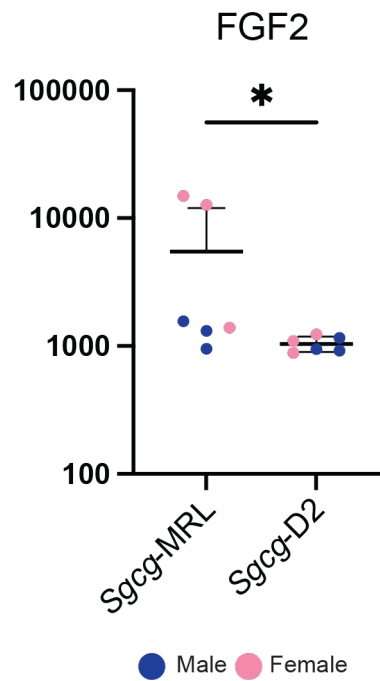

**Supplemental Figure 10.** Aptamer analysis of FGF2 serum indicated variability across animals, with exponentially higher expression in two *Sgcg*-MRL female mice. Statistical significance was determined using the Kolmogorov-Smirnov test. \*  $p < 0.05$

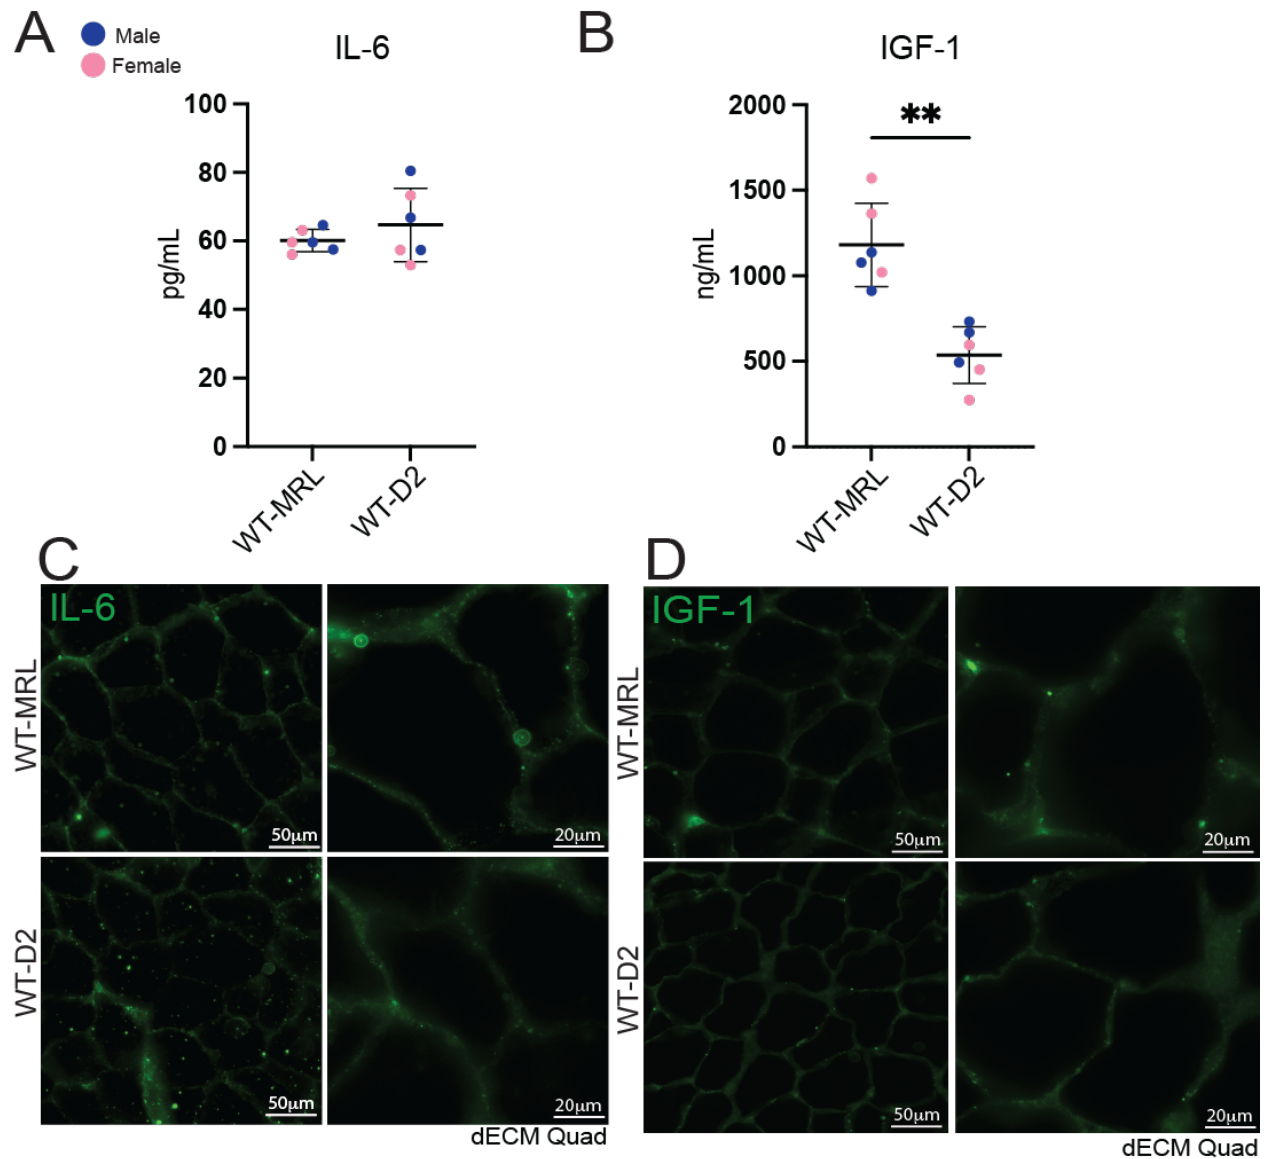

**Supplemental Figure 11.** ELISA of serum from WT-MRL and D2-WT mice at 20 weeks of age. **(A)** Serum IL-6 circulation was similar between WT-MRL and WT-D2 mice. **(B)** Serum IGF-1 was greater in WT-MRL strain compared to WT-D2 mice, which was the same pattern found in the dystrophic models (**Figure 6**). In contrast to what was seen in dystrophic dECMs, dECMs from WT-MRL and WT-D2 muscles showed minimal deposition of IL-6 **(C)** and IGF-1 **(D)**, in contrast to the IL-6 and IGF-1 deposition seen in *Sgcg*-MRL muscle (**Figure 6**). Graphical quantification of mean  $\pm$  SD. Statistical significance was determined using the Kolmogorov-Smirnov test. \*\*  $p < 0.01$ .
